# Supplementary material for: An integrated single-cell transcriptomic dataset for Mouse cortex
Source: Research Square preprint supplement (doi:10.21203/rs.3.rs-8195268/v1), 2025-12-18
Supplement: Supplementary file 1 [file c19e1b2fae84965036dc6479.xlsx]

## Sheet: Sheet1
Sample	GEO	species	platform	Sequencing Type	Tissue Region
GSM8072107	GSE255405	mouse	10x Chromium	scRNA-seq	cortex
GSM8072108	GSE255405	mouse	10x Chromium	scRNA-seq	cortex
GSM8072110	GSE255405	mouse	10x Chromium	scRNA-seq	cortex
GSM8072111	GSE255405	mouse	10x Chromium	scRNA-seq	cortex
GSM4083916	GSE137665	mouse	10x Chromium	scRNA-seq	cortex
GSM8504090	GSE276683	mouse	10x Chromium	snRNA-seq	cortex
GSM8436612	GSE273765	mouse	10x Chromium	snRNA-seq	cortex
GSM8436613	GSE273765	mouse	10x Chromium	snRNA-seq	cortex
GSM8436614	GSE273765	mouse	10x Chromium	snRNA-seq	cortex
GSM8436615	GSE273765	mouse	10x Chromium	snRNA-seq	cortex
GSM7665884	GSE239477	mouse	10x Chromium	snRNA-seq	cortex
GSM7665885	GSE239477	mouse	10x Chromium	snRNA-seq	cortex
GSM7665886	GSE239477	mouse	10x Chromium	snRNA-seq	cortex
GSM7665887	GSE239477	mouse	10x Chromium	snRNA-seq	cortex
GSM5253828	GSE172382	mouse	10x Chromium	snRNA-seq	cortex
GSM5253829	GSE172382	mouse	10x Chromium	snRNA-seq	cortex
GSM7719331	GSE160519	mouse	drop-seq	scRNA-seq	cortex
GSM7719332	GSE160519	mouse	drop-seq	scRNA-seq	cortex
GSM7719333	GSE160519	mouse	drop-seq	scRNA-seq	cortex
GSM7719334	GSE160519	mouse	drop-seq	scRNA-seq	cortex
GSM7719335	GSE160519	mouse	drop-seq	scRNA-seq	cortex
GSM7719336	GSE160519	mouse	drop-seq	scRNA-seq	cortex
GSM7719337	GSE160519	mouse	drop-seq	scRNA-seq	cortex
GSM7719338	GSE160519	mouse	drop-seq	scRNA-seq	cortex
GSM7719339	GSE160519	mouse	drop-seq	scRNA-seq	cortex
GSM7719340	GSE160519	mouse	drop-seq	scRNA-seq	cortex
GSM7719341	GSE160519	mouse	drop-seq	scRNA-seq	cortex
GSM7719342	GSE160519	mouse	drop-seq	scRNA-seq	cortex
GSM7719343	GSE160519	mouse	drop-seq	scRNA-seq	cortex
GSM7719344	GSE160519	mouse	drop-seq	scRNA-seq	cortex
GSM7719345	GSE160519	mouse	drop-seq	scRNA-seq	cortex
GSM7719346	GSE160519	mouse	drop-seq	scRNA-seq	cortex
GSM7719347	GSE160519	mouse	drop-seq	scRNA-seq	cortex
GSM7719348	GSE160519	mouse	drop-seq	scRNA-seq	cortex
GSM7719349	GSE160519	mouse	drop-seq	scRNA-seq	cortex
GSM7719350	GSE160519	mouse	drop-seq	scRNA-seq	cortex
GSM7719351	GSE160519	mouse	drop-seq	scRNA-seq	cortex
GSM7719352	GSE160519	mouse	drop-seq	scRNA-seq	cortex
GSM2845361	GSE106678	mouse	drop-seq	snRNA-seq	cortex
GSM2845362	GSE106678	mouse	drop-seq	snRNA-seq	cortex
GSM2845363	GSE106678	mouse	drop-seq	snRNA-seq	cortex
GSM2845364	GSE106678	mouse	drop-seq	snRNA-seq	cortex
GSM2845365	GSE106678	mouse	drop-seq	snRNA-seq	cortex
GSM2845366	GSE106678	mouse	drop-seq	snRNA-seq	cortex
GSM2845367	GSE106678	mouse	drop-seq	snRNA-seq	cortex
GSM2845368	GSE106678	mouse	drop-seq	snRNA-seq	cortex
GSM2845369	GSE106678	mouse	drop-seq	snRNA-seq	cortex
GSM2845370	GSE106678	mouse	drop-seq	snRNA-seq	cortex
GSM2845371	GSE106678	mouse	drop-seq	snRNA-seq	cortex
GSM2845372	GSE106678	mouse	drop-seq	snRNA-seq	cortex
GSM2845373	GSE106678	mouse	drop-seq	snRNA-seq	cortex
GSM3938160	GSE126074	mouse	drop-seq	snRNA-seq	cortex
GSM3938162	GSE126074	mouse	drop-seq	snRNA-seq	cortex
GSM3938164	GSE126074	mouse	drop-seq	snRNA-seq	cortex
GSM3938166	GSE126074	mouse	drop-seq	snRNA-seq	cortex
GSM3938168	GSE126074	mouse	drop-seq	snRNA-seq	cortex
GSM3938170	GSE126074	mouse	drop-seq	snRNA-seq	cortex
GSM3938172	GSE126074	mouse	drop-seq	snRNA-seq	cortex
GSM3938174	GSE126074	mouse	drop-seq	snRNA-seq	cortex
GSM3938176	GSE126074	mouse	drop-seq	snRNA-seq	cortex
GSM3938178	GSE126074	mouse	drop-seq	snRNA-seq	cortex
GSM3938180	GSE126074	mouse	drop-seq	snRNA-seq	cortex
GSM3938182	GSE126074	mouse	drop-seq	snRNA-seq	cortex
GSM3638502	GSE127774	humans, chimpanzees, bonobos, and macaques	10x Chromium	scRNA-seq	cortex
GSM3638503	GSE127774	humans, chimpanzees, bonobos, and macaques	10x Chromium	scRNA-seq	cortex
GSM3638504	GSE127774	humans, chimpanzees, bonobos, and macaques	10x Chromium	scRNA-seq	cortex
GSM3638505	GSE127774	humans, chimpanzees, bonobos, and macaques	10x Chromium	scRNA-seq	cortex
GSM3638506	GSE127774	humans, chimpanzees, bonobos, and macaques	10x Chromium	scRNA-seq	cortex
GSM3938161	GSE126074	mouse	10x Chromium	ATAC-seq	cortex
GSM3938163	GSE126074	mouse	10x Chromium	ATAC-seq	cortex
GSM3938165	GSE126074	mouse	10x Chromium	ATAC-seq	cortex
GSM3938167	GSE126074	mouse	10x Chromium	ATAC-seq	cortex
GSM3938169	GSE126074	mouse	10x Chromium	ATAC-seq	cortex
GSM3938171	GSE126074	mouse	10x Chromium	ATAC-seq	cortex
GSM3938173	GSE126074	mouse	10x Chromium	ATAC-seq	cortex
GSM3938175	GSE126074	mouse	10x Chromium	ATAC-seq	cortex
GSM3938177	GSE126074	mouse	10x Chromium	ATAC-seq	cortex
GSM3938179	GSE126074	mouse	10x Chromium	ATAC-seq	cortex
GSM3938181	GSE126074	mouse	10x Chromium	ATAC-seq	cortex
GSM3938183	GSE126074	mouse	10x Chromium	ATAC-seq	cortex
